# Supplementary material
Source: MDPI journal article supplement (https://www.mdpi.com/2076-3417/13/13/7674)
Supplement: s1 [file s1]

## Supporting Information

### Incorporation of UV filters into oil-in-water emulsions – release and permeability characteristics

Anna Olejnik <sup>1,2</sup>, Joanna Goscińska <sup>1,\*</sup>

<sup>1</sup> Adam Mickiewicz University in Poznań, Faculty of Chemistry, Department of Chemical Technology, Uniwersytetu Poznańskiego 8, 61-614 Poznań Poland

<sup>2</sup> Adam Mickiewicz University in Poznań, Centre for Advanced Technologies, Uniwersytetu Poznańskiego 10, 61-614 Poznań, Poland

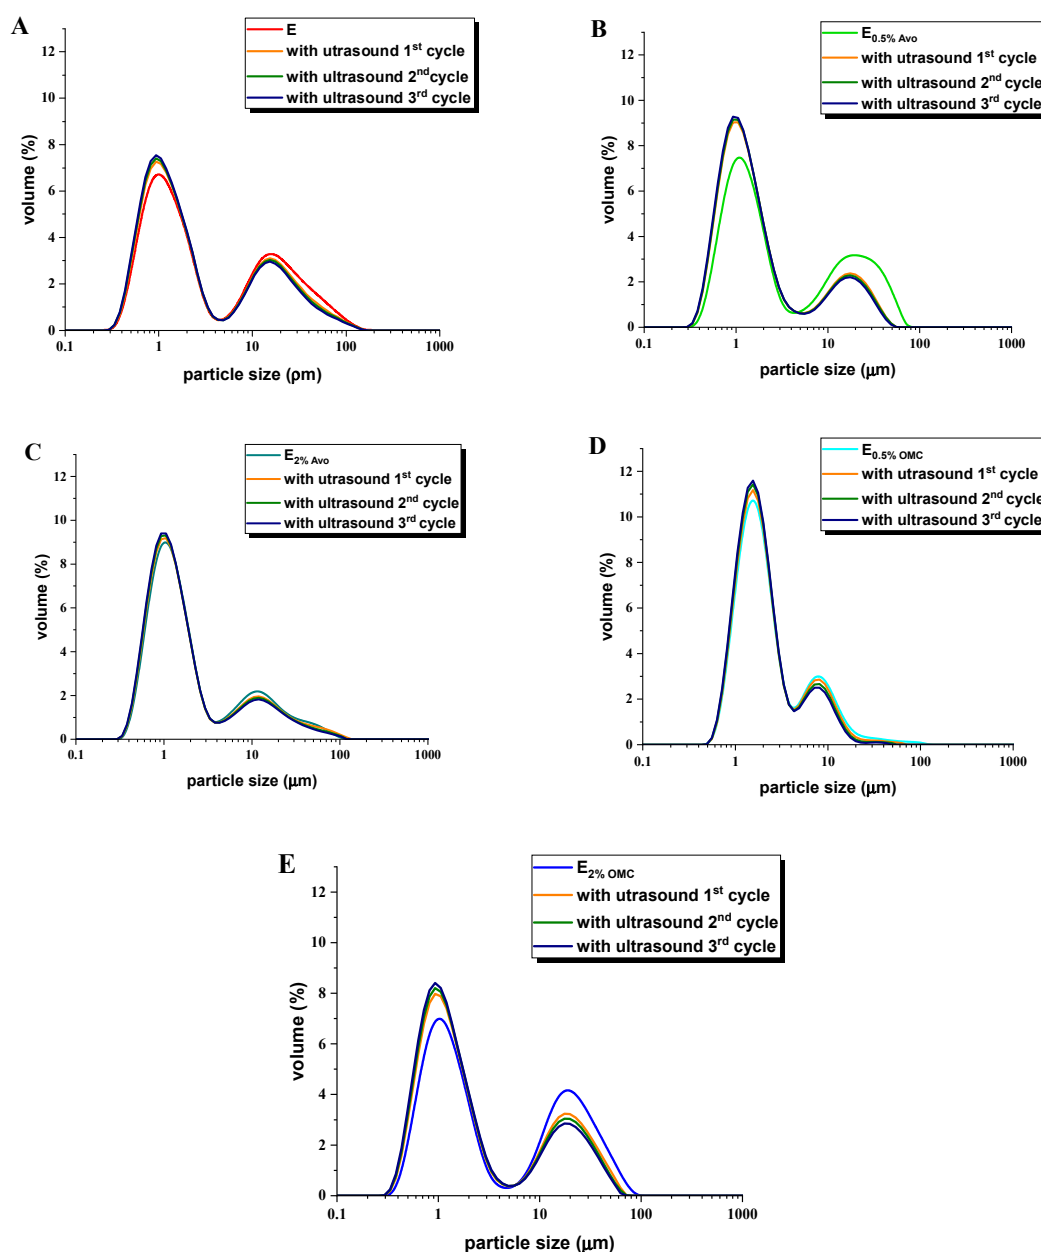

**Figure S1.** (A–E) Particle size distributions of formulations E, E<sub>0.5%Avo</sub>, E<sub>2%Avo</sub>, E<sub>0.5OMC</sub>, E<sub>2%OMC</sub> after ultrasound treatment.

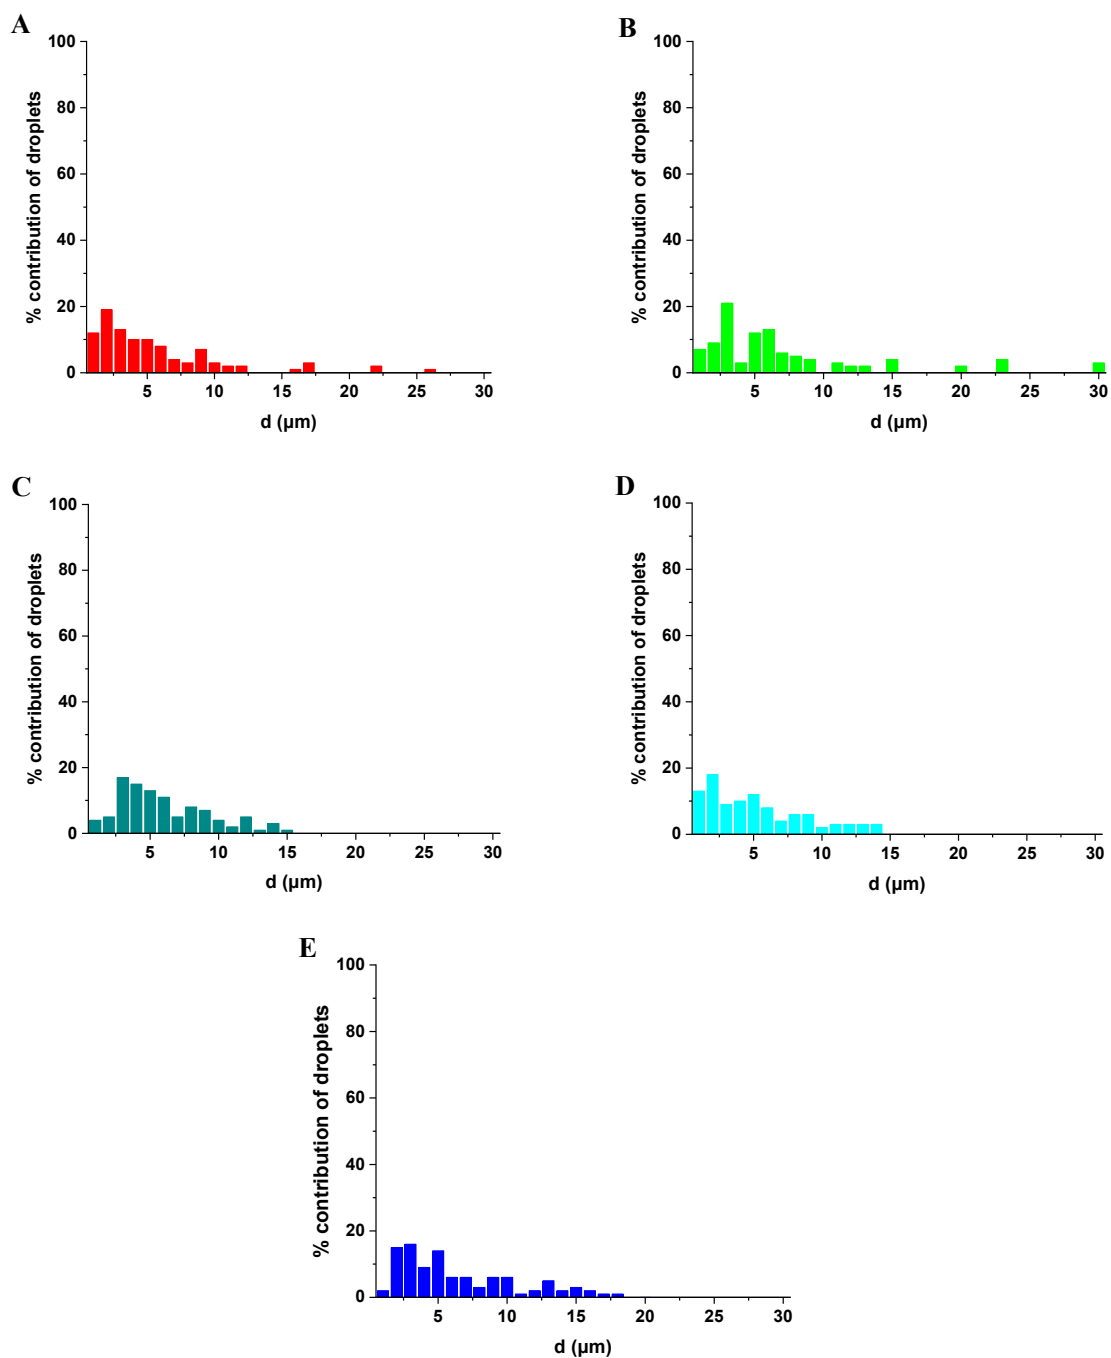

**Figure S2.** (A–E) Diagrams of droplet size of formulations E, E<sub>0.5%Avo</sub>, E<sub>2%Avo</sub>, E<sub>0.5%OMC</sub>, E<sub>2%OMC</sub>.
